# Supplementary material for: Image based quantitative comparisons indicate heightened megabenthos diversity and abundance at a site of weak hydrocarbon seepage in the southwestern Barents Sea
Source: PeerJ. 2019 Aug 8;7:e7398. doi: 10.7717/peerj.7398 (PMC6689391; doi:10.7717/peerj.7398)
Supplement: Supplemental Information 1 — Measurements of sulfide and sulfate taken at different depths below the sediment surface and at the sediment-water interface from push cores taken within the seafloor imaged in mosaic A (seep location). [file peerj-07-7398-s001.xlsx]

## Sheet: Sheet1
push core	depth below sediment surface (cm)	SO42-(mM)	HS (µM)
P18-028	0	28.4197	0
	0	28.8361	n/a
	1	28.4197	0
	2	28.9402	n/a
	3	27.8992	n/a
	4	28.4197	n/a
	6	27.5869	0
	8	26.0254	n/a
	10	25.1926	n/a
	13	24.9844	n/a
	16	24.568	176.714
	19	23.4229	n/a
	22	23.1106	n/a
	25	22.6941	645.912
	29	20.7162	n/a
	33	20.2998	1710.59
P18-031	0	27.7951	n/a
	0	26.3377	n/a
	1	27.8992	0
	2	26.9623	n/a
	3	26.4418	n/a
	4	26.1295	0
	6	24.8803	n/a
	8	25.2967	n/a
	10	24.9844	43.0524
	12	25.2967	n/a
	14	23.6311	n/a
	17	24.0475	327.366
	21	21.8613	n/a
	25	23.8393	168.26
P18-032	0	28.2115	0
	2	26.65	0
	4	28.1074	n/a
	6	28.2115	0
	8	26.9623	n/a
	10	27.2746	0
	12	27.7951	n/a
	16	27.5869	0
	20	27.2746	n/a
	24	27.0664	0
	28	27.3787	n/a
	34	26.7541	0
P18-033	0	28.8361	n/a
	1	29.1484	0
	3	28.4197	n/a
	5	28.6279	n/a
	7	28.1074	0
	9	27.691	n/a
	13	28.0033	0
	17	26.9623	n/a
	21	26.9623	0
	25	26.4418	n/a
	29	25.4008	1.6074
	33	24.6721	n/a
	37	24.1516	76.2339
	41	24.1516	n/a
	45	23.3188	273.493
